# Supplementary material for: Targeting MDMX and PKCδ to improve current uveal melanoma therapeutic strategies
Source: PubMed Central journal article supplement (PMC5874255; doi:10.1038/s41389-018-0041-y), 2018-03-29

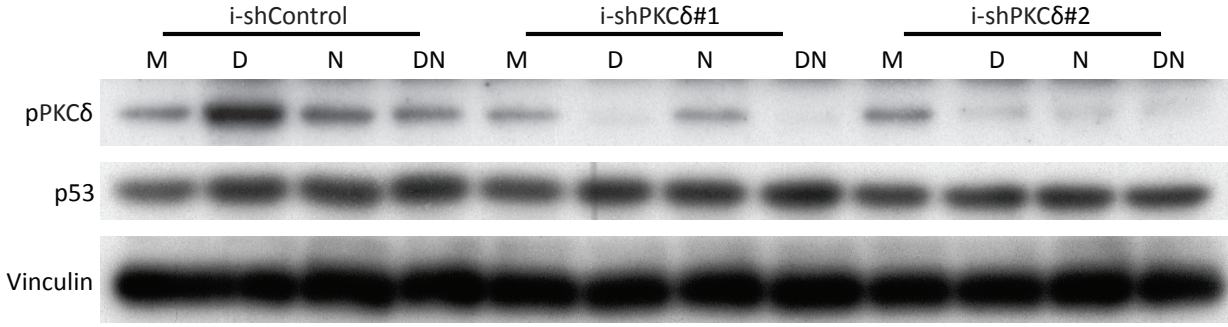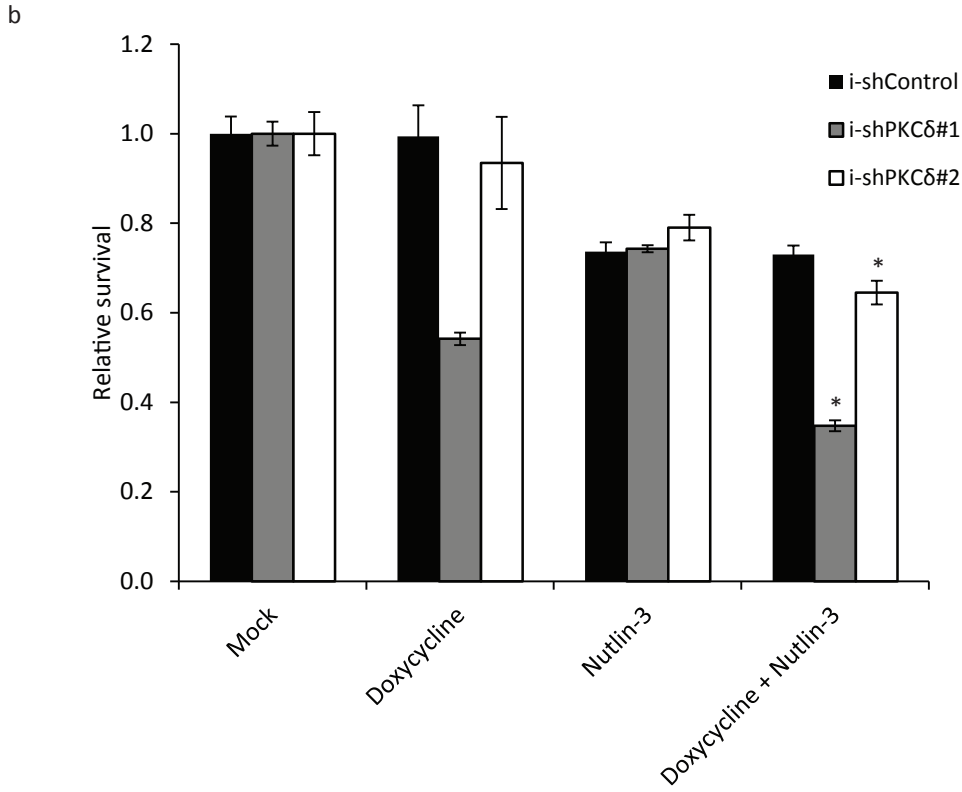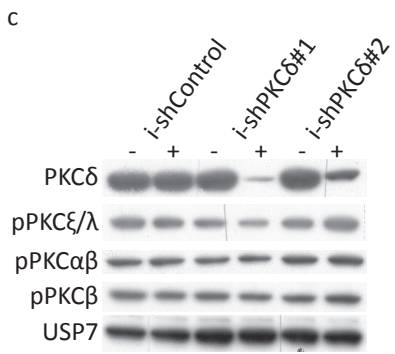

Supplement: 41389_2018_41_MOESM5_ESM.pdf [file 41389_2018_41_MOESM5_ESM.pdf]
